# Supplementary material
Source: Royal Society of Chemistry journal article supplement (doi:10.1039/d5tb02382c)
Supplement: d5tb02382c1.pdf [file d5tb02382c1.pdf]

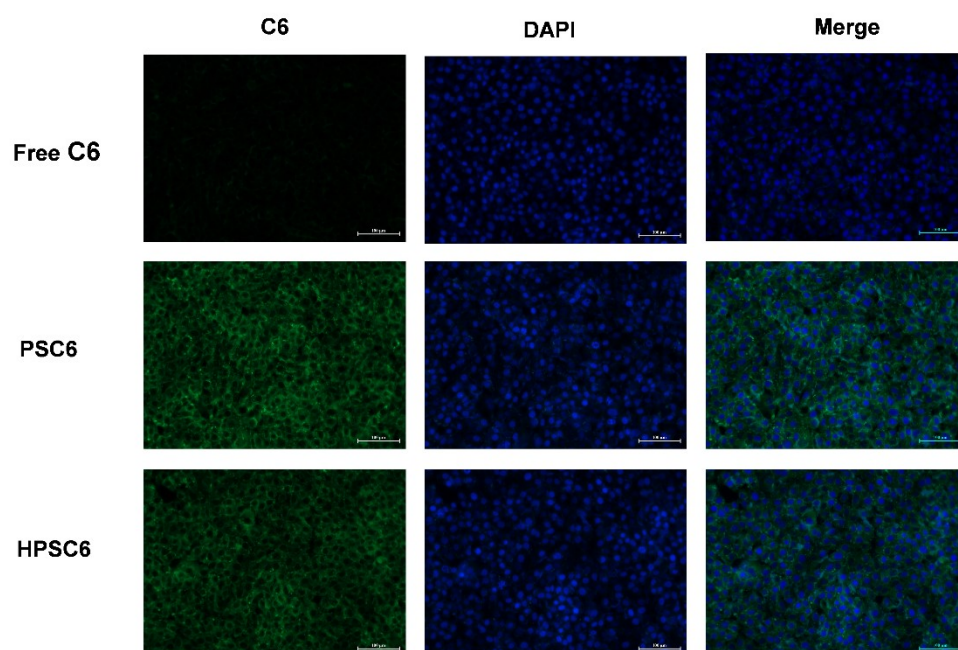

S1 - Cellular uptake experiment: qualitative observation of C6 uptake by ID8 cells using inverted fluorescence microscopy (n= 3, scale bar= 100  $\mu$ m).

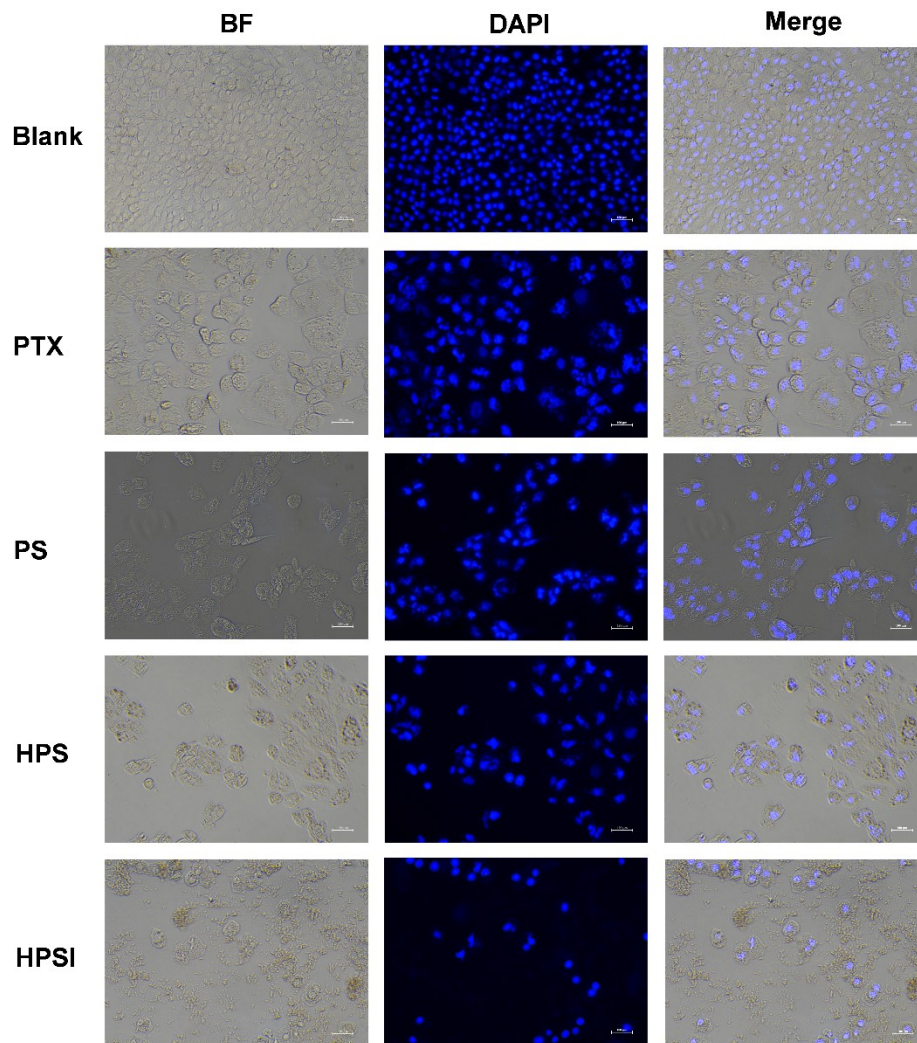

S2 - Cell Apoptosis Assay: Morphological observation of cellular apoptosis (scale bar= 100  $\mu\text{m}$ )
